# Supplementary material
Source: PubMed Central journal article supplement (PMC5641445)
Supplement: NIHMS908163-supplement-Supplementary_Material.pdf [file NIHMS908163-supplement-Supplementary_Material.pdf]

## Supporting Information:

### Structure-Based Design of Highly Selective and Potent G Protein-Coupled Receptor Kinase 2 Inhibitors Based on Paroxetine

*Helen V. Waldschmidt<sup>a</sup>, Kristoff T. Homan<sup>b,†</sup>, Marilyn C. Cato<sup>b</sup>, Osvaldo Cruz-Rodriguez<sup>b,c</sup>,  
Alessandro Cannavo<sup>d</sup>, Michael W. Wilson<sup>e</sup>, Jianliang Song<sup>d</sup>, Joseph Y. Cheung<sup>d</sup>, Walter J.  
Koch<sup>d</sup>, John J. G. Tesmer<sup>a,b,c</sup>, and Scott D. Larsen<sup>\*a,e</sup>*

<sup>a</sup>Department of Medicinal Chemistry, College of Pharmacy, <sup>b</sup>Departments of Pharmacology and  
Biological Chemistry, Life Sciences Institute, <sup>c</sup>PhD Program in Chemical Biology, <sup>d</sup>Center for  
Translational Medicine, Temple University, Philadelphia, Pennsylvania, 19140, <sup>e</sup>Vahlteich  
Medicinal Chemistry Core, University of Michigan, Ann Arbor, Michigan, 48109

Table of contents:

|                                                                                           |           |
|-------------------------------------------------------------------------------------------|-----------|
| Table S1: Crystal Refinement Statistics                                                   | <b>S2</b> |
| Table S2: Mouse cardiomyocyte contractility in response to paroxetine, 2, 14ak, and 14as. | <b>S3</b> |
| Table S3: Biochemical data for compounds <b>15</b> , <b>16</b> , and <b>17</b>            | <b>S3</b> |

**Supplementary Table 1.** Crystal Refinement Statistics.

| Protein Complex                                | GRK2-G $\beta$ $\gamma$ -14ak | GRK2-G $\beta$ $\gamma$ -14bd | GRK2-G $\beta$ $\gamma$ -14as |
|------------------------------------------------|-------------------------------|-------------------------------|-------------------------------|
| X-ray source                                   | APS 21-ID-G                   | APS 21-ID-G                   | APS 21-ID-D                   |
| wavelength (Å)                                 | 0.9785                        | 0.9786                        | 0.9785                        |
| $D_{\min}$ (Å)                                 | 50.00-2.60 (2.64-2.60)        | 50.00-2.15 (2.19-2.15)        | 30-3.0 (3.04-3.03)            |
| space group                                    | <i>P</i> 2                    | <i>C</i> 2                    | <i>C</i> 2                    |
| unit cell constants (Å)                        | $a=113.1, b=62.4, c=102.0$    | $a=194.3, b=71.4, c=111.3$    | $a=189.0, b=74.2, c=123.2$    |
| (°)                                            | $\beta=92.8$                  | $\beta=110.5$                 | $\beta=115.5$                 |
| unique reflections                             | 39963 (1987)                  | 77337 (3805)                  | 29942 (4657)                  |
| $R_{\text{sym}}$ (%)                           | 9.8                           | 16.1                          | 12.9                          |
| completeness (%)                               | 85.8                          | 99.0                          | 98.5                          |
| $\langle I \rangle / \langle \sigma_I \rangle$ | 9.2 (0.8)                     | 24.9 (1.4)                    | 12.8 (2.0)                    |
| redundancy                                     | 2.6 (2.5)                     | 18.3 (11.2)                   | 6.8 (6.8)                     |
| refinement resolution (Å)                      | 30.00-2.60 (2.69-2.60)        | 30.00-2.15 (2.23-2.15)        | 30.00-3.03 (3.14-3.03)        |
| total reflections used                         | 35989                         | 73370                         | 207836                        |
| RMSD bond lengths (Å)                          | 0.011                         | 0.018                         | 0.012                         |
| RMSD bond angles (°)                           | 1.53                          | 1.90                          | 1.56                          |
| est. coordinate error (Å)                      | 0.360                         | 0.142                         | 0.404                         |
| Ramachandran Plot:                             |                               |                               |                               |
| most favored, allowed, outliers (%)            | 92.5, 5.6, 1.9                | 95.3, 3.8, 0.9                | 93.2, 5.3, 1.8                |
| $R_{\text{work}}$                              | 0.2207                        | 0.1821                        | 0.1971                        |
| $R_{\text{free}}$                              | 0.2807                        | 0.2275                        | 0.2516                        |
| protein atoms                                  | 8089                          | 8261                          | 8192                          |
| water molecules                                | 43                            | 388                           | 23                            |
| inhibitor atoms                                | 34                            | 35                            | 33                            |
| average $B$ -factor (Å <sup>2</sup> )          | 80.2                          | 55.2                          | 105.0                         |
| protein                                        | 80.3                          | 55.6                          | 105.0                         |
| inhibitor                                      | 70.2                          | 69.3                          | 123.3                         |
| MolProbity score                               | 2.01                          | 1.70                          | 1.74                          |
| MolProbity % $C\beta$ deviations               | 0                             | 0.52                          | 0                             |
| MolProbity % bad backbone bonds                | 0                             | 0.04                          | 0.01                          |
| MolProbity % bad backbone angles               | 0                             | 0.05                          | 0.01                          |
| PDB entry                                      | ---                           | ---                           | ---                           |

\*Entries in parentheses indicate data in the highest resolution shell

**Supplementary Table 2:** Mouse cardiomyocyte contractility in response to paroxetine, 2, 14ak, and 14as.

|                                      | <b>Paroxetine</b> |           |           |           | <b>2</b>  |           |           |           | <b>14ak</b> |           |           | <b>14as</b> |           |           |           |
|--------------------------------------|-------------------|-----------|-----------|-----------|-----------|-----------|-----------|-----------|-------------|-----------|-----------|-------------|-----------|-----------|-----------|
| Concentration (μM)                   | 0                 | 0.5       | 1         | 10        | 0         | 0.1       | 0.5       | 1         | 0           | 0.5       | 1         | 0           | 0.1       | 0.5       | 1         |
| <b>Baseline before isoproterenol</b> |                   |           |           |           |           |           |           |           |             |           |           |             |           |           |           |
| MCA (% cell length)                  | 5.0 ± 0.5         | 4.0 ± 0.3 | 4.3 ± 0.8 | 4.2 ± 0.5 | 4.8 ± 0.5 | 3.6 ± 0.4 | 4.2 ± 0.3 | 4.4 ± 0.5 | 5.1 ± 1.1   | 5.1 ± 1.1 | 5.2 ± 0.6 | 4.4 ± 0.3   | 3.3 ± 0.2 | 3.5 ± 0.4 | 3.5 ± 0.2 |
| <b>After isoproterenol</b>           |                   |           |           |           |           |           |           |           |             |           |           |             |           |           |           |
| MCA (% cell length)                  | 12 ± 0.6          | 14 ± 1    | 13 ± 0.8  | 16 ± 0.5* | 13 ± 0.5  | 12 ± 0.7  | 16 ± 1*   | 17 ± 1.3* | 12 ± 1.3    | 12 ± 1.1  | 13 ± 0.9  | 11 ± 0.9    | 14 ± 0.7* | 18 ± 1.3* | 15 ± 1.2* |
| % increase                           | 146 ± 16          | 248 ± 26  | 262 ± 60  | 296 ± 45* | 178 ± 24  | 252 ± 27  | 277 ± 28* | 293 ± 35* | 198 ± 66    | 166 ± 38  | 173 ± 41  | 161 ± 20    | 341 ± 33* | 433 ± 90* | 342 ± 65* |

Values represent the mean ± SEM for 6-8 cardiomyocytes. \*,p<0.05 vs DMSO Control. MCA, maximum contraction amplitude.

**Supplementary Table 3:** Biochemical Data for previously reported compounds **15**, **16**, and **17**.

| <b>Compound</b> | <b>GRK2 IC<sub>50</sub> (μM)</b> | <b>GRK1 IC<sub>50</sub> (μM)</b> | <b>GRK5 IC<sub>50</sub> (μM)</b> | <b>PKA IC<sub>50</sub> (μM)</b> | <b>ROCK1 IC<sub>50</sub> (μM)</b> |
|-----------------|----------------------------------|----------------------------------|----------------------------------|---------------------------------|-----------------------------------|
| <b>15</b>       | 0.13±0.03                        | > 100                            | > 100                            | > 100                           | 6.7±8.2                           |
| <b>16</b>       | 0.07±0.01                        | >100                             | 63±32                            | >100                            | 5.8±5.5                           |
| <b>17</b>       | 0.15±0.07                        | 3.9±1.0                          | 0.38±0.06                        | >100                            | 0.01±0.01                         |
